# Supplementary material for: Korean Atrial Fibrillation (AF) Network: Genetic Variants for AF Do Not Predict Ablation Success
Source: PubMed Central journal article supplement — J Am Heart Assoc. 2015 Aug 13;4(8):e002046. doi: 10.1161/JAHA.115.002046 (PMC4599462; doi:10.1161/jaha.115.002046), 2015-08-13
Supplement: jah30004-e002046-sd1.pdf [file jah30004-e002046-sd1.pdf]

## SUPPLEMENTAL MATERIAL

**Table S1.** Subgroup Association Analyses of 3 known AF loci and atrial fibrillation in non-hypertension (n=558, n=1049), non-diabetes (n=929, n=1054), non-CHF (n=998, n=1067) and non-Stroke, -CAD and -CHF (n=796, n=1067). N=Cases, n=controls.

| Nearest gene | SNP        | Chr | Position  | non-hypertension    |                          | non-diabetes        |                          | non-CHF             |                          | Non-stroke, non-CAD and non-CHF |                          |
|--------------|------------|-----|-----------|---------------------|--------------------------|---------------------|--------------------------|---------------------|--------------------------|---------------------------------|--------------------------|
|              |            |     |           | OR (95%CI)          | P value                  | OR (95%CI)          | P value                  | OR (95%CI)          | P value                  | OR (95%CI)                      | P value                  |
| PITX2        | rs6843082  | 4   | 111937516 | 2.92<br>(2.25-3.79) | 1.00 x10 <sup>-15</sup>  | 3.03<br>(2.34-3.92) | 2.92 x 10 <sup>-17</sup> | 3.19<br>(2.48-4.11) | 2.02 x 10 <sup>-19</sup> | 3.38<br>(2.55-4.46)             | 1.32 x 10 <sup>-17</sup> |
| PITX2        | rs2200733  | 4   | 111929618 | 2.22<br>(1.81-2.73) | 2.37 x 10 <sup>-14</sup> | 2.25<br>(1.84-2.75) | 4.02 x 10 <sup>-15</sup> | 2.26<br>(1.86-2.75) | 2.31 x10 <sup>-16</sup>  | 2.18<br>(1.77-2.69)             | 2.45 x 10 <sup>-13</sup> |
| ZFH3         | rs2106261  | 16  | 71609121  | 2.18<br>(1.78-2.66) | 2.46 x 10 <sup>-14</sup> | 2.17<br>(1.79-2.64) | 8.70 x 10 <sup>-15</sup> | 2.16<br>(1.79-2.60) | 1.07 x 10 <sup>-15</sup> | 2.11<br>(1.73-2.58)             | 1.83 x10 <sup>-13</sup>  |
| KCNN3        | rs13376333 | 1   | 153080977 | 1.64<br>(0.91-2.96) | 0.10                     | 1.70<br>(0.95-3.04) | 0.075                    | 1.66<br>(0.95-2.90) | 0.078                    | 1.76<br>(0.95-3.27)             | 0.073                    |

Abbreviations: Chr, chromosome; OR, odds ratio; CI, confidence interval; CHF, congestive heart failure; CAD, coronary artery disease

\*adjusted for age, sex, body mass index, hypertension, diabetes mellitus, and congestive heart failure, as appropriately
